# Supplementary material for: RUNX1 facilitates heart failure progression through regulating TGF-β-induced cardiac remodeling
Source: PeerJ. 2023 Oct 31;11:e16202. doi: 10.7717/peerj.16202 (PMC10624168; doi:10.7717/peerj.16202)
Supplement: Supplemental Information 4 [file peerj-11-16202-s004.xls]

## Sheet: Sheet1
		Group		body weight（g）	heart weight（g）	Heart/body							P value
		A.TAC+lenti-NC	1	31.4	0.226	0.719745
			2	33.6	0.2138	0.63631
			3	30.1	0.192	0.637874
			4	29.1	0.1713	0.58866
			5	30.7	0.1953	0.636156		0.643749					0.19968
		B.TAC+lenti-shRUNX1）	1	29.2	0.1387	0.475
			2	27.8	0.1335	0.480216
			3	29.6	0.1517	0.5125
			4	30.3	0.1295	0.427393
			5	30.1	0.1383	0.459468		0.470915					0.13834
		C.Control	1	26.6	0.0871	0.327444
			2	28.3	0.0957	0.338163
			3	27.4	0.0974	0.355474
			4	29.1	0.097	0.333333
			5	29.7	0.1189	0.400337		0.35095	0.00026228				0.09922
