# Supplementary material for: RUNX1 facilitates heart failure progression through regulating TGF-β-induced cardiac remodeling
Source: PeerJ. 2023 Oct 31;11:e16202. doi: 10.7717/peerj.16202 (PMC10624168; doi:10.7717/peerj.16202)
Supplement: Supplemental Information 5 [file peerj-11-16202-s005.xlsx]

## Sheet: PTGS-WT
	RUNX1+TGF β	RUNX1	TGF β	NC
	1	2	3	4	5	6	7	8	9	10	11	12
A	16	0	15	10									Lum
B	5	13	0	1									Lum
C	7	7	7	11									Lum
D	12	16	14	4									Lum
E													Lum
F													Lum
G													Lum
H													Lum
	1	2	3	4	5	6	7	8	9	10	11	12
A	15858	28383	24591	10860									1-Firefly:Lum
B	20952	3617	8645	4323									1-Firefly:Lum
C	14141	47151	33305	5627									1-Firefly:Lum
D	21503	37164	10953	37199									1-Firefly:Lum
E													1-Firefly:Lum
F													1-Firefly:Lum
G													1-Firefly:Lum
H													1-Firefly:Lum
	1	2	3	4	5	6	7	8	9	10	11	12
A	25532	15633	12849	2968									Lum
B	31105	1944	5120	2501									Lum
C	27030	27556	22691	2703									Lum
D	27401	26492	6254	5319									Lum
E													Lum
F													Lum
G													Lum
H													Lum
UTR	#REF!	#REF!	#REF!	#REF!
miRNA	Control	RUNX1	Control	RUNX1
	1.61066	0.550787	0.522217	0.272627
	1.4847	0.535794	0.59225	0.578436
	1.91191	0.584359	0.681242	0.479345
	1.27444	0.712717	0.570436	0.142896
Average	1.57043	0.595914	0.591536	0.368326
Standard Deviation	0.266577	0.0804721	0.0665784	0.197018
P value		0.00871701		0.0786433
homogenization Average	1	0.37946	1	0.62266
homogenization standard deviation	0.169748	0.0512422	0.112552	0.333062
p		0.00871701		0.0786433
